# Supplementary material
Source: HighWire-hosted journal article supplement (https://www.cmaj.ca/highwire/filestream/58270/field_highwire_adjunct_files/0/comm-parshuram-1-at.pdf)
Supplement: comm-parshuram-1-at.pdf [file comm-parshuram-1-at.pdf]

**Appendix 1 (as supplied by the authors): Volumes < 0.1mL required for preparation of parenterally administered medication\***

| Medication              | 3 kg neonate Stock Solution Volume (mL) | 5 kg infant Stock Solution Volume (mL) | 10 kg infant Stock Solution Volume (mL) | 20 kg child Stock Solution Volume (mL) |
|-------------------------|-----------------------------------------|----------------------------------------|-----------------------------------------|----------------------------------------|
| Adenosine               | 0.05                                    | -                                      | -                                       | -                                      |
| Alprostadil             | 0.01875                                 | -                                      | -                                       | -                                      |
| Calcitriol              | -                                       | 0.025                                  | 0.05                                    | -                                      |
| Carboprost Tromethamine | -                                       | 0.002                                  | 0.004                                   | 0.008                                  |
| Darbopoietin            | -                                       | 0.09                                   |                                         | -                                      |
| Diazepam                | 0.06                                    |                                        |                                         | -                                      |
| Enalaprilat             |                                         | 0.02                                   | 0.04                                    | 0.08                                   |
| Enoxaparin              | 0.0225                                  | 0.025                                  | 0.05                                    | -                                      |
| Esmolol                 |                                         | 0.05                                   | -                                       | -                                      |
| Fomiprazole             | -                                       | 0.05                                   | -                                       | -                                      |
| Growth Hormone          | -                                       | 0.06                                   | -                                       | -                                      |
| Hydralazine             | 0.0425                                  | 0.0375                                 | 0.075                                   | -                                      |
| Hydrocortisone          | 0.03                                    | -                                      | -                                       | -                                      |
| Hydromorphone           | -                                       | 0.0375                                 | 0.075                                   | -                                      |
| Lorazepam               | 0.0375                                  | 0.03125                                | 0.0625                                  | -                                      |
| Methylprednisolone      | -                                       | 0.0625                                 | -                                       | -                                      |
| Metaclopramide          | 0.02                                    | -                                      | -                                       | -                                      |
| Midazolam               | -                                       | 0.05                                   | -                                       | -                                      |
| Morphine                | 0.075                                   | -                                      | -                                       | -                                      |
| Naloxone                | -                                       | 0.0125                                 | 0.025                                   | 0.05                                   |
| Phenoxybenzamine        | -                                       | 0.0125                                 | 0.025                                   | 0.05                                   |
| Phenylephrine           | -                                       | 0.0025                                 | 0.005                                   | 0.01                                   |
| Propranolol             | 0.00750                                 | 0.05                                   | -                                       | -                                      |
| Pyridoxime              |                                         | 0.05                                   | -                                       | -                                      |
| Ranitidine              | 0.0375                                  | -                                      | -                                       | -                                      |
| Rifampicin              | 0.05                                    | -                                      | -                                       | -                                      |
| Salbutamol              | -                                       | 0.02                                   | 0.04                                    | 0.08                                   |
| Tacrolimus              | -                                       | 0.025                                  | 0.05                                    | -                                      |
| Vecuronium              | 0.09                                    | -                                      | -                                       | -                                      |
|                         |                                         |                                        |                                         |                                        |
| Number of Medications   | 13                                      | 20                                     | 12                                      | 6                                      |

\*The table shows medications with one or more indication for which the recommended dose requires preparation from less than 0.1 mL of the least concentrated commercially available formulation. The table was constructed using recommendations from the formulary of a university-affiliated paediatric hospital and the least concentrated parenteral preparation that was commercially available in Canada.
